# Supplementary material
Source: Springer Nature journal article supplement (https://www.springermedizin.de/resource/supplementary/13012_2011_398_MOESM2_ESM.pdf/9629924)
Supplement: MOESM2 [file 9629924]

**Stakeholders**  
(e.g., peer advocates  
primary care physicians,  
social workers)

**Researchers**  
(e.g., principal investigator,  
co-investigators,  
intervention developers)

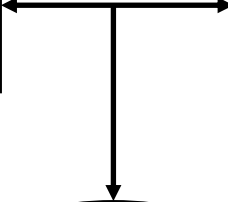

**CBPR Principles**

- Shared health concern
- Ownership
- Co-learning
- Capacity building

**Community  
Advisory Board  
Using Intervention  
Mapping**

**Intervention Preparation Projects**  
(e.g., patient focus groups, stakeholder  
interviews, feasibility pilot study)

**Modified Intervention**
